# Supplementary material for: Discrimination of Bacillus subtilis from Other Bacillus Species Using Specific Oligonucleotide Primers for the Pyruvate Carboxylase and Shikimate Dehydrogenase Genes
Source: PubMed Central journal article supplement (PMC9628935; doi:10.4014/jmb.2205.05014), 2022-07-08

**Table S1. Polymorphic sites of 16S rRNA gene sequence in five *Bacillus* species.**

| Species                     | Strain                  | Nucleotide at polymorphic site (total 1550 bp) |    |     |     |     |     |     |     |     |     |     |     |     |     |      |      |      |      |      |      |      |      |      |      |
|-----------------------------|-------------------------|------------------------------------------------|----|-----|-----|-----|-----|-----|-----|-----|-----|-----|-----|-----|-----|------|------|------|------|------|------|------|------|------|------|
|                             |                         | 88                                             | 96 | 131 | 179 | 184 | 187 | 201 | 270 | 284 | 464 | 471 | 482 | 483 | 996 | 1015 | 1016 | 1029 | 1031 | 1044 | 1057 | 1250 | 1269 | 1460 | 1461 |
| <i>B. subtilis</i>          | KCCM 32835 <sup>T</sup> | C                                              | T  | G   | G   | T   | A   | A   | C   | G   | G   | G   | T   | A   | G   | A    | T    | A    | G    | G    | T    | A    | A    | T    | A    |
| <i>B. subtilis</i>          | PS832                   | .                                              | .  | .   | .   | .   | .   | .   | .   | .   | .   | .   | .   | .   | .   | .    | .    | .    | .    | .    | .    | .    | .    | .    | .    |
| <i>B. subtilis</i>          | HRBS-10TDI13            | .                                              | .  | A   | .   | .   | .   | .   | .   | .   | A   | .   | .   | .   | .   | .    | .    | .    | .    | .    | .    | .    | .    | .    |      |
| <i>B. subtilis</i>          | GFR-12                  | .                                              | .  | A   | .   | .   | .   | .   | .   | .   | A   | .   | .   | .   | .   | .    | .    | .    | .    | .    | .    | .    | .    | .    |      |
| <i>B. subtilis</i>          | 2RL2-3                  | .                                              | .  | A   | .   | .   | .   | .   | .   | .   | A   | .   | .   | .   | .   | .    | .    | .    | .    | .    | .    | .    | .    | .    |      |
| <i>B. subtilis</i>          | SRCM102748              | .                                              | .  | .   | .   | .   | .   | .   | T   | A   | A   | .   | .   | .   | .   | .    | .    | .    | .    | .    | .    | .    | .    | .    |      |
| <i>B. velezensis</i>        | KMU01                   | .                                              | .  | .   | .   | .   | .   | G   | .   | .   | .   | A   | C   | .   | .   | .    | .    | .    | .    | .    | .    | .    | .    | .    |      |
| <i>B. velezensis</i>        | B268                    | .                                              | .  | .   | .   | .   | .   | G   | .   | A   | .   | A   | C   | .   | .   | .    | .    | .    | .    | .    | .    | .    | .    | .    |      |
| <i>B. velezensis</i>        | S4                      | .                                              | .  | .   | .   | C   | .   | G   | .   | .   | .   | A   | C   | .   | .   | .    | .    | .    | .    | .    | .    | .    | .    | .    |      |
| <i>B. velezensis</i>        | KKLW                    | .                                              | .  | .   | .   | C   | G   | G   | .   | .   | .   | A   | C   | .   | .   | .    | .    | .    | .    | .    | .    | .    | .    | .    |      |
| <i>B. velezensis</i>        | DMB06                   | .                                              | .  | .   | .   | .   | .   | G   | .   | .   | .   | A   | C   | .   | A   | .    | .    | .    | .    | .    | .    | G    | .    | A    | T    |
| <i>B. siamensis</i>         | SCSIO05746              | .                                              | .  | .   | .   | .   | .   | G   | .   | .   | .   | A   | C   | .   | .   | .    | .    | .    | .    | .    | .    | .    | .    | A    | T    |
| <i>B. siamensis</i>         | SDLI1                   | .                                              | .  | .   | .   | .   | .   | G   | .   | .   | .   | A   | C   | .   | .   | .    | .    | .    | .    | .    | .    | .    | .    | A    | T    |
| <i>B. siamensis</i>         | B28                     | .                                              | .  | .   | C   | .   | .   | G   | .   | .   | .   | A   | C   | .   | .   | .    | .    | .    | .    | .    | .    | G    | .    | A    | T    |
| <i>B. amyloliquefaciens</i> | MT45                    | .                                              | .  | .   | C   | .   | .   | G   | .   | .   | .   | A   | C   | .   | .   | .    | .    | .    | .    | .    | .    | G    | .    | .    | T    |
| <i>B. amyloliquefaciens</i> | RD7-7                   | .                                              | .  | .   | C   | .   | .   | G   | .   | .   | .   | A   | C   | .   | .   | .    | .    | .    | .    | .    | .    | G    | .    | .    | T    |
| <i>B. amyloliquefaciens</i> | YP6                     | .                                              | C  | .   | C   | .   | .   | .   | .   | .   | .   | A   | C   | G   | .   | .    | .    | .    | .    | .    | .    | G    | .    | .    | T    |
| <i>B. amyloliquefaciens</i> | KCCM 40764 <sup>T</sup> | T                                              | .  | .   | C   | .   | .   | G   | .   | .   | .   | A   | C   | .   | .   | .    | .    | .    | .    | .    | C    | G    | .    | .    | T    |
| <i>B. atropheus</i>         | SRCM101359              | .                                              | .  | .   | C   | .   | .   | .   | T   | A   | .   | .   | C   | .   | .   | C    | C    | G    | T    | .    | .    | .    | G    | A    | T    |
| <i>B. atropheus</i>         | GQJK17                  | .                                              | .  | .   | C   | .   | .   | .   | T   | A   | .   | A   | C   | .   | .   | C    | C    | G    | T    | .    | .    | .    | G    | A    | T    |
| <i>B. atropheus</i>         | BA59                    | .                                              | .  | .   | C   | .   | .   | .   | T   | A   | .   | A   | C   | .   | .   | C    | C    | G    | T    | .    | .    | .    | G    | A    | T    |

Abbreviations: ., same sequence with *B. subtilis* KCCM 32835<sup>T</sup>; -, non-nucleotide.

1 **Table S2. Homology of concatenated sequence of each MLST method.**

| Species                     | Strain                  | Homology (%) |      |      |      |      |
|-----------------------------|-------------------------|--------------|------|------|------|------|
|                             |                         | pubMLST      | S1   | S2   | S3   | L1   |
| <i>B. subtilis</i>          | KCCM 32835 <sup>T</sup> | 100          | 100  | 100  | 100  | 100  |
| <i>B. subtilis</i>          | PS832                   | 99.5         | 99.5 | 99.8 | 100  | 100  |
| <i>B. subtilis</i>          | HRBS-10TDI13            | 99.3         | 99.3 | 99.0 | 98.9 | 99.4 |
| <i>B. subtilis</i>          | 2RL2-3                  | 99.3         | 99.3 | 99.0 | 98.9 | 99.4 |
| <i>B. subtilis</i>          | GFR-12                  | 99.3         | 99.3 | 99.0 | 98.9 | 99.4 |
| <i>B. subtilis</i>          | SRCM102748              | 99.4         | 99.4 | 99.4 | 99.8 | 99.5 |
| <i>B. velezensis</i>        | KMU01                   | 82.0         | 82.0 | 82.1 | 80.3 | 84.5 |
| <i>B. velezensis</i>        | B268                    | 81.7         | 81.7 | 82.1 | 80.3 | 84.4 |
| <i>B. velezensis</i>        | KKLW                    | 82.0         | 82.0 | 82.2 | 80.4 | 84.8 |
| <i>B. velezensis</i>        | S4                      | 82.1         | 82.1 | 82.1 | 80.3 | 84.6 |
| <i>B. velezensis</i>        | DMB06                   | 81.6         | 81.6 | 82.1 | 80.4 | 84.7 |
| <i>B. siamensis</i>         | SCSIO 05746             | 82.1         | 82.1 | 82.2 | 80.0 | 84.9 |
| <i>B. siamensis</i>         | SDLI1                   | 82.1         | 82.1 | 82.2 | 80.0 | 84.9 |
| <i>B. siamensis</i>         | B28                     | 82.0         | 82.0 | 82.1 | 80.1 | 84.9 |
| <i>B. amyloliquefaciens</i> | MT45                    | 82.4         | 82.4 | 82.2 | 80.5 | 84.8 |
| <i>B. amyloliquefaciens</i> | RD7-7                   | 82.2         | 82.2 | 82.2 | 80.6 | 84.7 |
| <i>B. amyloliquefaciens</i> | YP6                     | 82.4         | 82.4 | 82.2 | 80.6 | 84.7 |
| <i>B. amyloliquefaciens</i> | KCCM 40764 <sup>T</sup> | 82.1         | 82.1 | 82.1 | 80.2 | 84.5 |
| <i>B. atrophaeus</i>        | GQJK17                  | 83.5         | 83.5 | 83.6 | 82.1 | 85.2 |
| <i>B. atrophaeus</i>        | SRCM101359              | 83.2         | 83.2 | 83.5 | 82.2 | 85.1 |
| <i>B. atrophaeus</i>        | BA59                    | 83.2         | 83.2 | 83.5 | 82.2 | 85.1 |

2 **Table S3. Similarity of housekeeping gene sequences in five *Bacillus* species.**

|                             |                         | Homology (%) |             |             |             |            |             |             |             |             |            |             |             |             |             |              |             |             |
|-----------------------------|-------------------------|--------------|-------------|-------------|-------------|------------|-------------|-------------|-------------|-------------|------------|-------------|-------------|-------------|-------------|--------------|-------------|-------------|
|                             |                         | <i>Adk</i>   | <i>aroE</i> | <i>ccpA</i> | <i>glpF</i> | <i>gmk</i> | <i>gyrA</i> | <i>gyrB</i> | <i>ilvD</i> | <i>MutL</i> | <i>pta</i> | <i>purH</i> | <i>pycA</i> | <i>pyrE</i> | <i>rpoD</i> | <i>spo0A</i> | <i>sucC</i> | <i>tpiA</i> |
| <i>B. subtilis</i>          | KCCM 32835 <sup>T</sup> | 100          | 100         | 100         | 100         | 100        | 100         | 100         | 100         | 100         | 100        | 100         | 100         | 100         | 100         | 100          | 100         | 100         |
| <i>B. subtilis</i>          | PS832                   | 100          | 99.9        | 100         | 99.6        | 100        | 100         | 100         | 100         | 99.6        | 100        | 100         | 100         | 100         | 96.6        | 100          | 100         | 100         |
| <i>B. subtilis</i>          | HRBS-10TDI13            | 98.8         | 98.8        | 99.9        | 99.3        | 99.5       | 99.0        | 99.1        | 99.9        | 97.4        | 99.1       | 96.9        | 98.9        | 97.7        | 99.1        | 99.6         | 99.4        | 100         |
| <i>B. subtilis</i>          | GFR-12                  | 98.8         | 98.8        | 99.9        | 99.3        | 99.5       | 99.0        | 99.1        | 99.9        | 97.4        | 99.1       | 96.9        | 98.9        | 97.7        | 99.1        | 99.6         | 99.4        | 100         |
| <i>B. subtilis</i>          | 2RL2-3                  | 98.8         | 98.8        | 99.9        | 99.3        | 99.5       | 99.0        | 99.1        | 99.9        | 97.4        | 99.1       | 96.9        | 98.9        | 97.7        | 99.1        | 99.6         | 99.4        | 100         |
| <i>B. subtilis</i>          | SRCM102748              | 100          | 99.4        | 99.5        | 98.8        | 100        | 99.0        | 99.2        | 99.0        | 99.6        | 100        | 98.8        | 99.9        | 100         | 99.5        | 100          | 100         | 99.7        |
| <i>B. velezensis</i>        | KMU01                   | 91.1         | 68.1        | 83.1        | 77.3        | 83.6       | 79.0        | 80.3        | 81.2        | 74.8        | 82.9       | 81.0        | 79.8        | 73.9        | 84.9        | 85.3         | 87.9        | 92.8        |
| <i>B. velezensis</i>        | B268                    | 91.1         | 68.2        | 83.1        | 77.4        | 84.1       | 79.2        | 80.3        | 81.2        | 74.8        | 83.1       | 81.0        | 79.8        | 73.9        | 84.9        | 85.2         | 87.9        | 92.4        |
| <i>B. velezensis</i>        | S4                      | 91.1         | 67.3        | 82.8        | 77.8        | 83.6       | 78.9        | 80.2        | 81.0        | 74.9        | 83.2       | 81.2        | 79.7        | 73.7        | 85.0        | 85.4         | 88.0        | 93.2        |
| <i>B. velezensis</i>        | KKLW                    | 91.1         | 68.3        | 83.3        | 77.9        | 83.6       | 79.2        | 80.5        | 80.8        | 74.5        | 83.4       | 81.2        | 79.8        | 74.0        | 84.7        | 85.7         | 87.9        | 93.3        |
| <i>B. velezensis</i>        | DMB06                   | 91.1         | 68.0        | 83.2        | 78.0        | 84.1       | 78.9        | 80.4        | 80.8        | 75.1        | 82.4       | 81.1        | 79.8        | 73.7        | 84.8        | 85.4         | 88.0        | 93.2        |
| <i>B. siamensis</i>         | SCSIO 05746             | 90.5         | 68.0        | 82.4        | 77.8        | 85.5       | 79.2        | 79.8        | 81.6        | 74.4        | 83.7       | 80.8        | 79.9        | 74.3        | 84.6        | 85.3         | 88.2        | 92.8        |
| <i>B. siamensis</i>         | SDLI1                   | 90.5         | 68.0        | 82.4        | 77.8        | 85.5       | 79.2        | 79.8        | 81.5        | 74.4        | 83.7       | 80.8        | 79.9        | 74.3        | 84.6        | 85.3         | 88.2        | 92.8        |
| <i>B. siamensis</i>         | B28                     | 90.2         | 67.0        | 82.9        | 77.5        | 85.5       | 79.1        | 80.2        | 81.2        | 74.4        | 83.5       | 81.3        | 79.7        | 74.8        | 84.6        | 85.1         | 88.0        | 92.9        |
| <i>B. amyloliquefaciens</i> | MT45                    | 91.6         | 68.6        | 82.5        | 78.0        | 85.0       | 79.2        | 80.0        | 81.0        | 74.2        | 84.2       | 81.1        | 79.8        | 75.1        | 84.4        | 85.9         | 88.0        | 92.7        |
| <i>B. amyloliquefaciens</i> | RD7-7                   | 91.4         | 69.0        | 82.7        | 77.3        | 85.2       | 79.3        | 80.2        | 81.0        | 74.3        | 83.7       | 81.2        | 79.9        | 74.8        | 84.4        | 85.6         | 87.7        | 92.9        |
| <i>B. amyloliquefaciens</i> | YP6                     | 91.6         | 68.9        | 82.8        | 77.8        | 84.9       | 79.2        | 80.3        | 80.7        | 74.5        | 84.2       | 81.3        | 79.9        | 75.1        | 84.6        | 85.4         | 87.9        | 92.8        |
| <i>B. amyloliquefaciens</i> | KCCM 40764 <sup>T</sup> | 91.3         | 68.1        | 82.3        | 77.8        | 84.7       | 79.3        | 80.1        | 80.6        | 74.4        | 83.6       | 81.2        | 79.7        | 75.0        | 84.4        | 85.6         | 88.2        | 92.7        |
| <i>B. atrophaeus</i>        | SRCM101359              | 93.1         | 74.6        | 79.9        | 83.6        | 86.8       | 79.5        | 80.8        | 82.3        | 76.1        | 85.6       | 82.5        | 81.8        | 77.4        | 86.8        | 84.1         | 88.1        | 90.3        |
| <i>B. atrophaeus</i>        | GQJK17                  | 92.8         | 74.4        | 80.8        | 83.6        | 86.5       | 79.4        | 80.3        | 82.4        | 76.1        | 85.9       | 82.2        | 82.1        | 78.0        | 86.7        | 84.0         | 87.9        | 90.6        |
| <i>B. atrophaeus</i>        | BA59                    | 93.1         | 74.5        | 80.4        | 83.6        | 86.8       | 79.2        | 80.6        | 82.2        | 76.1        | 85.5       | 82.4        | 81.9        | 77.7        | 86.6        | 84.1         | 87.7        | 90.4        |

3 **Fig. S1. Phylogenetic tree of housekeeping gene used in the developed MLST method.** The data were compared using simple matching  
 4 coefficients and were clustered by the maximum likelihood method. Branches with bootstrap values of 50% have been collapsed. The scale

5 the diagram is the pairwise  
 6 distance expressed as the  
 7 percentage of dissimilarity.  
 8

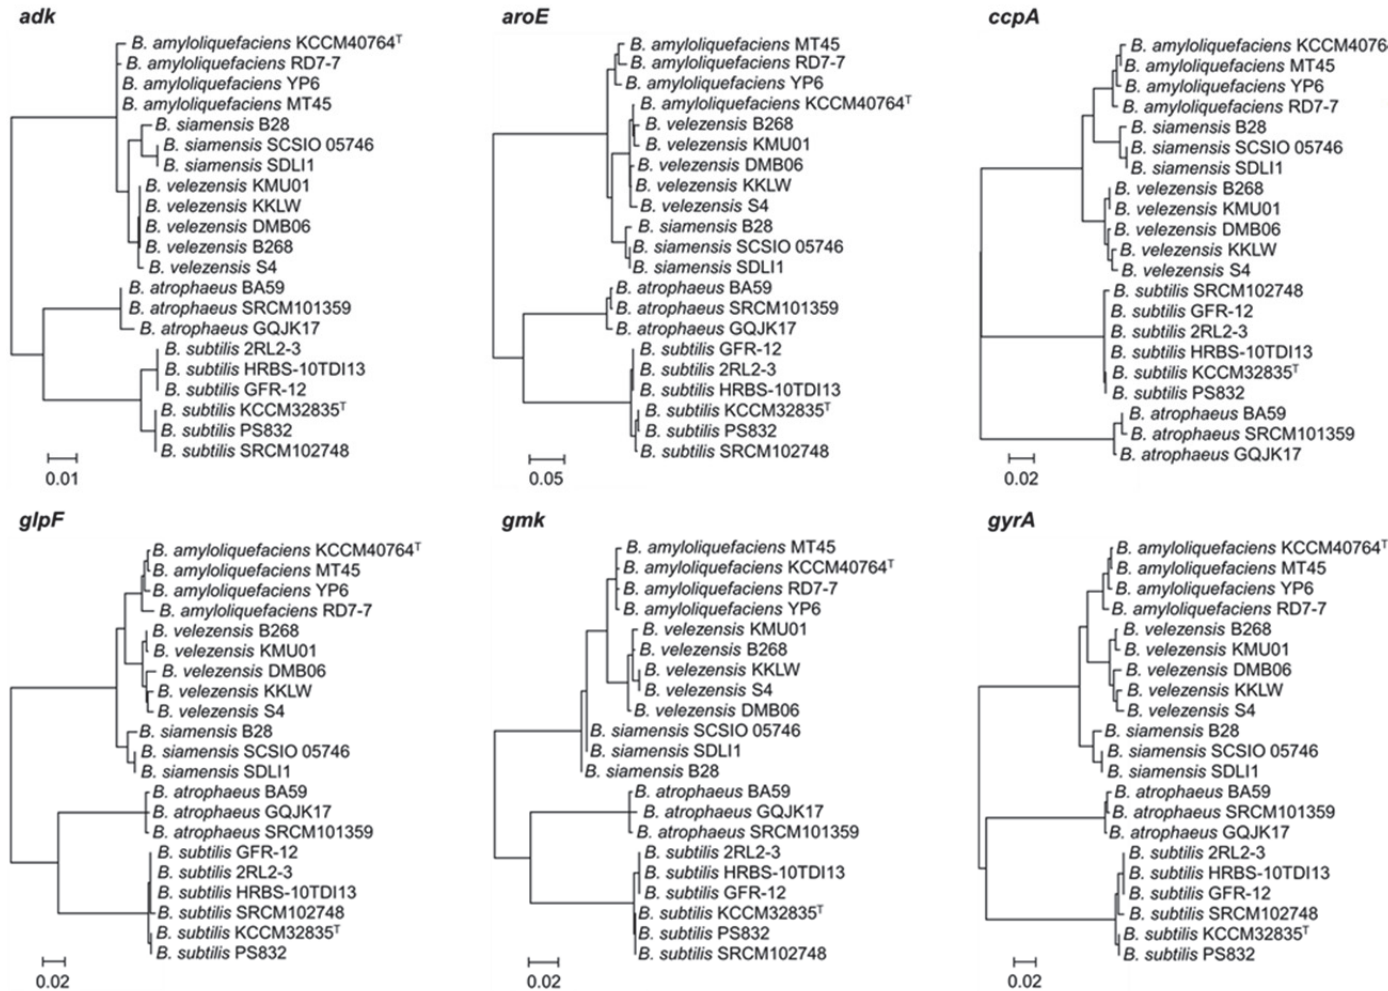

**gyrB**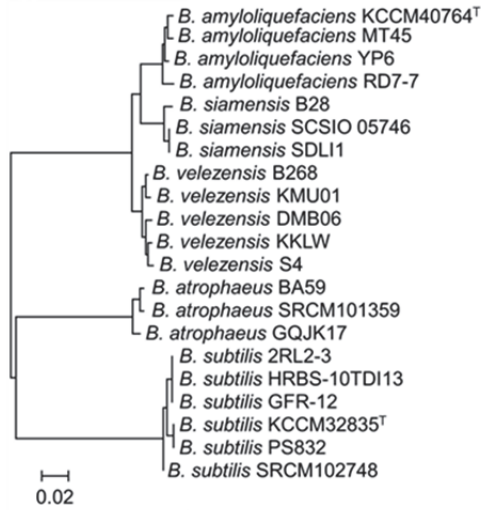**ilvD**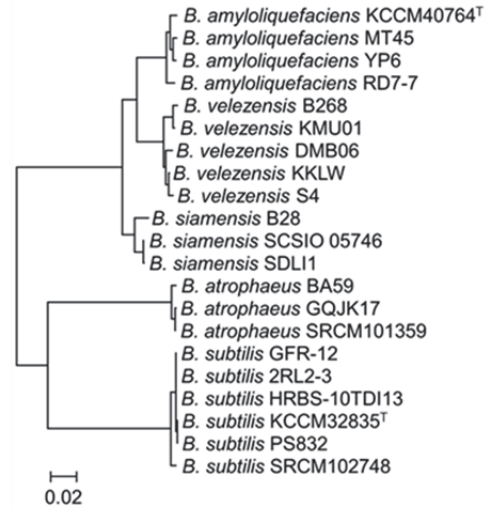**mutL**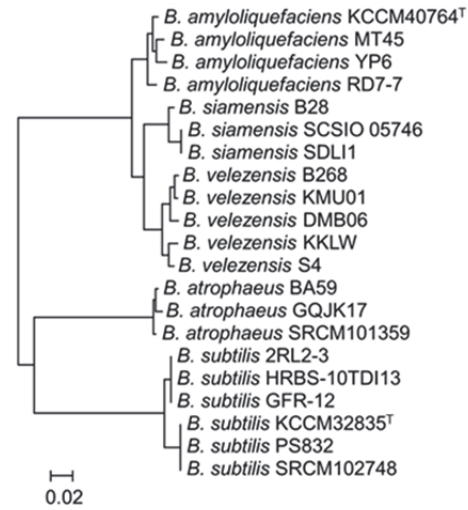**pta**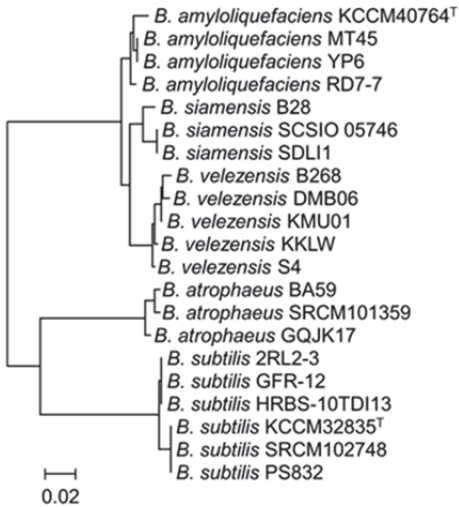**purH**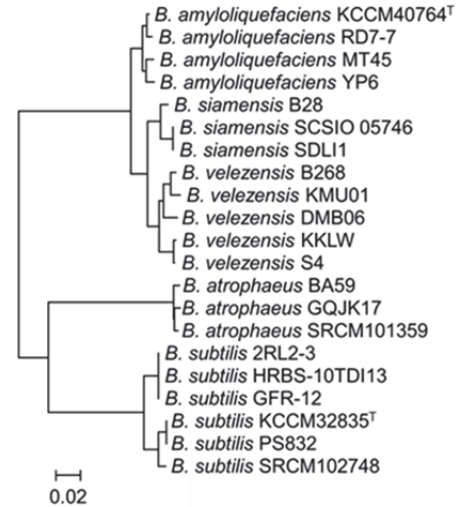**pycA**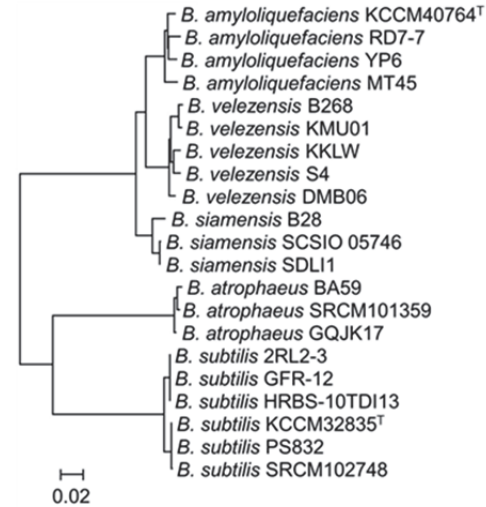

**pyrE**

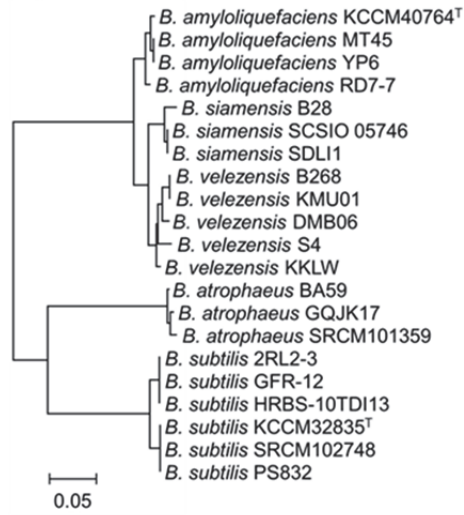

**rpoD**

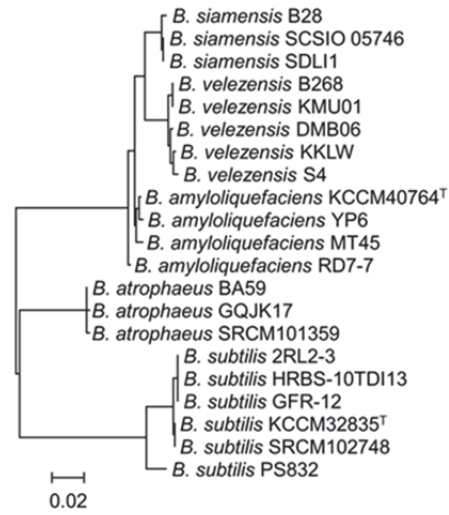

**spo0A**

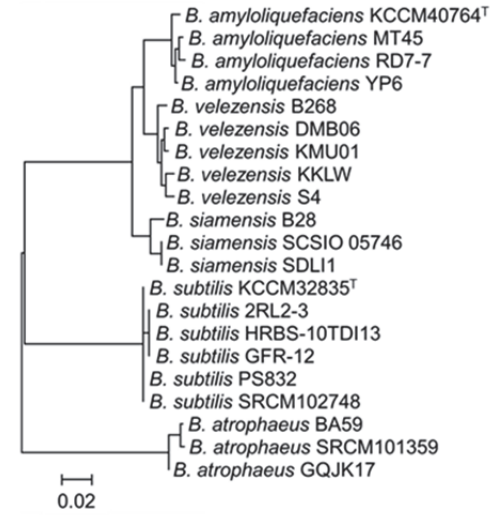

**sucC**

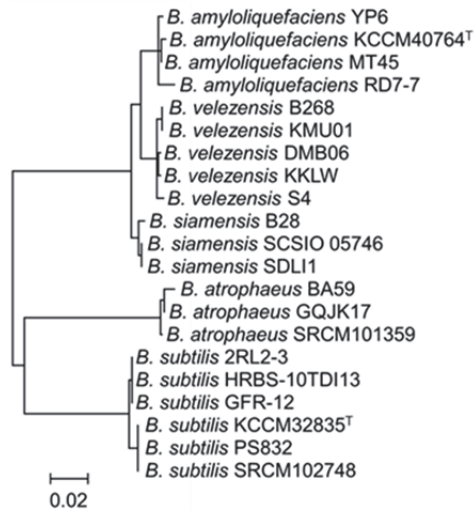

**tpiA**

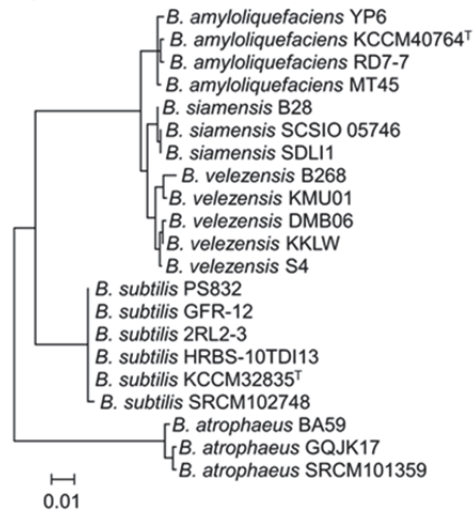

**Fig. S2. Identification of *B. subtilis* using *B. subtilis* specific primer. (A) *pycA* gene, (B) *aroE* gene.**

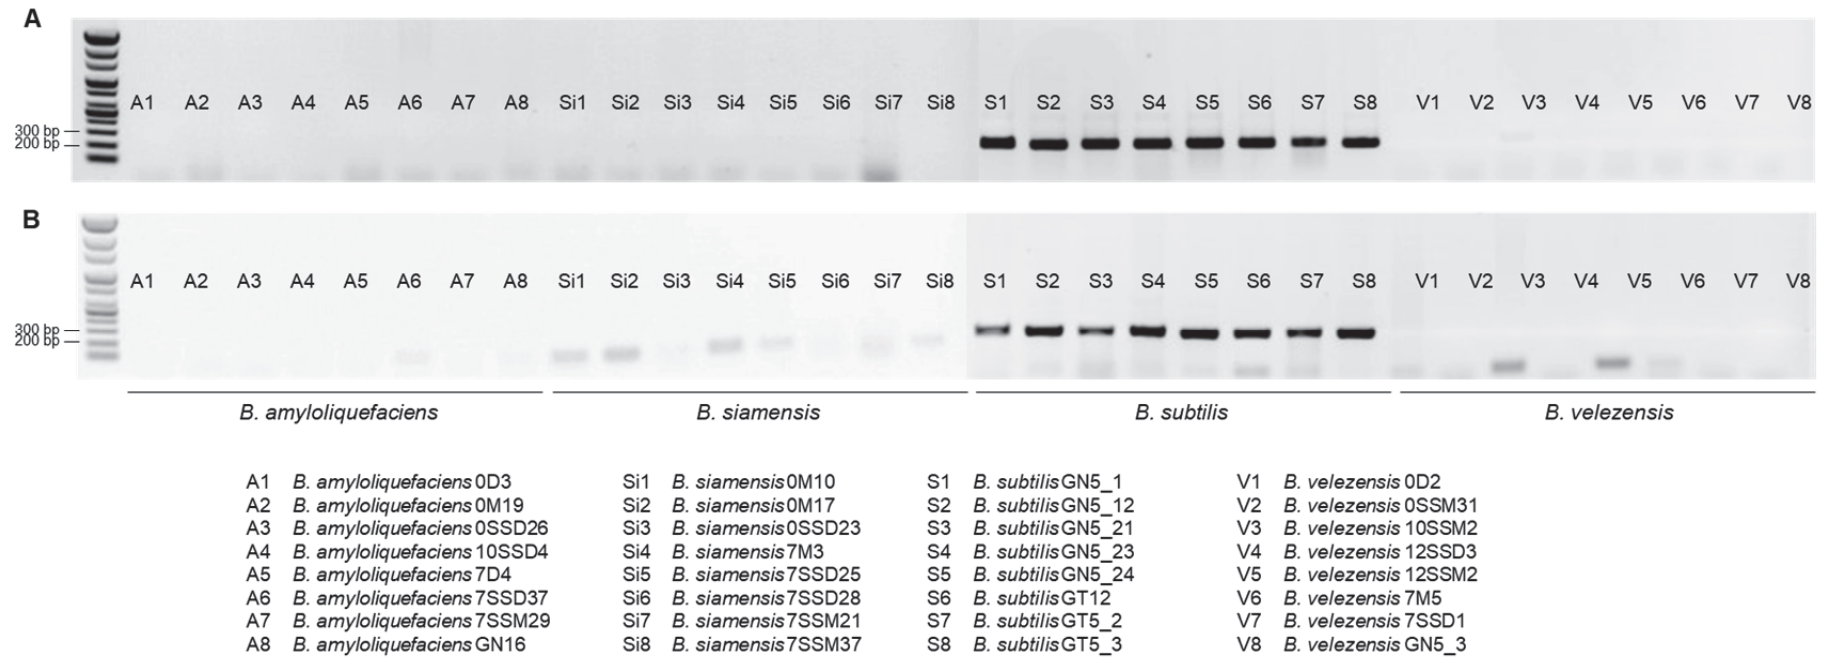

Supplement: jmb-32-8-1011-supple.pdf [file jmb-32-8-1011-supple.pdf]
